# Supplementary material
Source: Springer Nature journal article supplement (https://www.springermedizin.de/resource/supplementary/13075_2004_1584_MOESM8_ESM.pdf/9690110)

# Percent with endoscopic ulcer

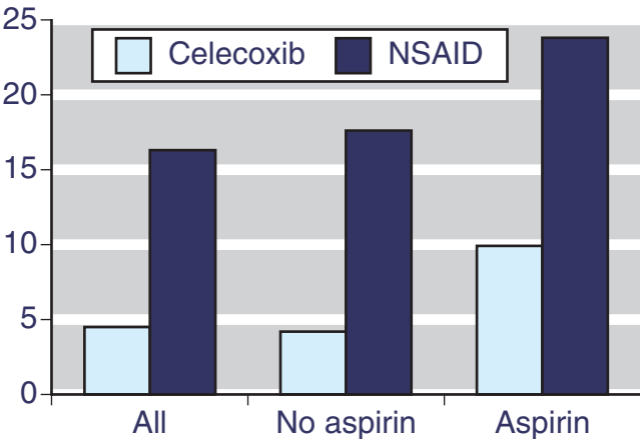

Supplement: MOESM8 [file 9690110]
